# Supplementary material for: Microtubule-Mediated NLRP3 Inflammasome Activation Is Independent of Microtubule-Associated Innate Immune Factor GEF-H1 in Murine Macrophages
Source: PubMed Central journal article supplement (PMC7072875; doi:10.3390/ijms21041302), 2020-02-14
Supplement: ijms-21-01302-s001.pdf [file ijms-21-01302-s001.pdf]

## Supplementary materials

### **Microtubule-mediated NLRP3 inflammasome activation is independent of microtubule-associated innate immune factor GEF-H1 in murine macrophages**

Hsuan-Ju Lai<sup>1, †</sup>, Yi-Hsuan Hsu<sup>1, †</sup>, Guan-Ying Lee<sup>1, †</sup> and Hao-Sen Chiang<sup>1, 2, \*</sup>

<sup>1</sup> Department of Life Science, National Taiwan University, Taipei 10617, Taiwan

<sup>2</sup> Genome and Systems Biology Degree Program, National Taiwan University, Taipei 10617, Taiwan

† These authors contributed equally to this work

\*Corresponding author:

Hao-Sen Chiang, Ph.D.

R818 Life Science Building

1 Sec 4 Roosevelt Road

Taipei 10617, Taiwan

Phone: +886-2-3366-2454

Fax: +886-2-2363-6837

E-mail: [hschiang@ntu.edu.tw](mailto:hschiang@ntu.edu.tw)

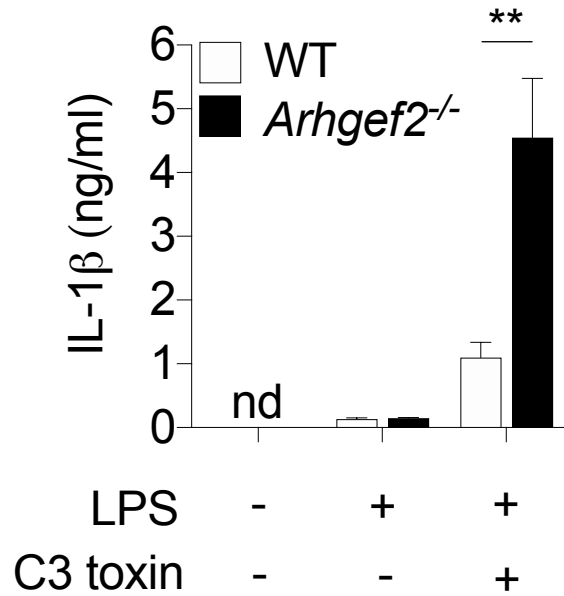

**Supplementary Figure 1.** GEF-H1 regulates the pyrin inflammasome activation. ELISA analysis of culture supernatants of LPS-primed wild-type (WT) or GEF-H1-deficient (*Arhgef2*<sup>-/-</sup>) BMDMs treated with or without C3 toxin. BMDMs were first primed with 100 ng/ml LPS for 6 h followed by incubation with 0.5 μg/ml C3 toxin (Cytosekeleton, Cat. #CT03) for additional 6 h. *n*=3 independent experiments per group. Data represent mean±SD. Statistical analyses were performed using unpaired two-tailed t-test. \*\*, *p*<0.01.

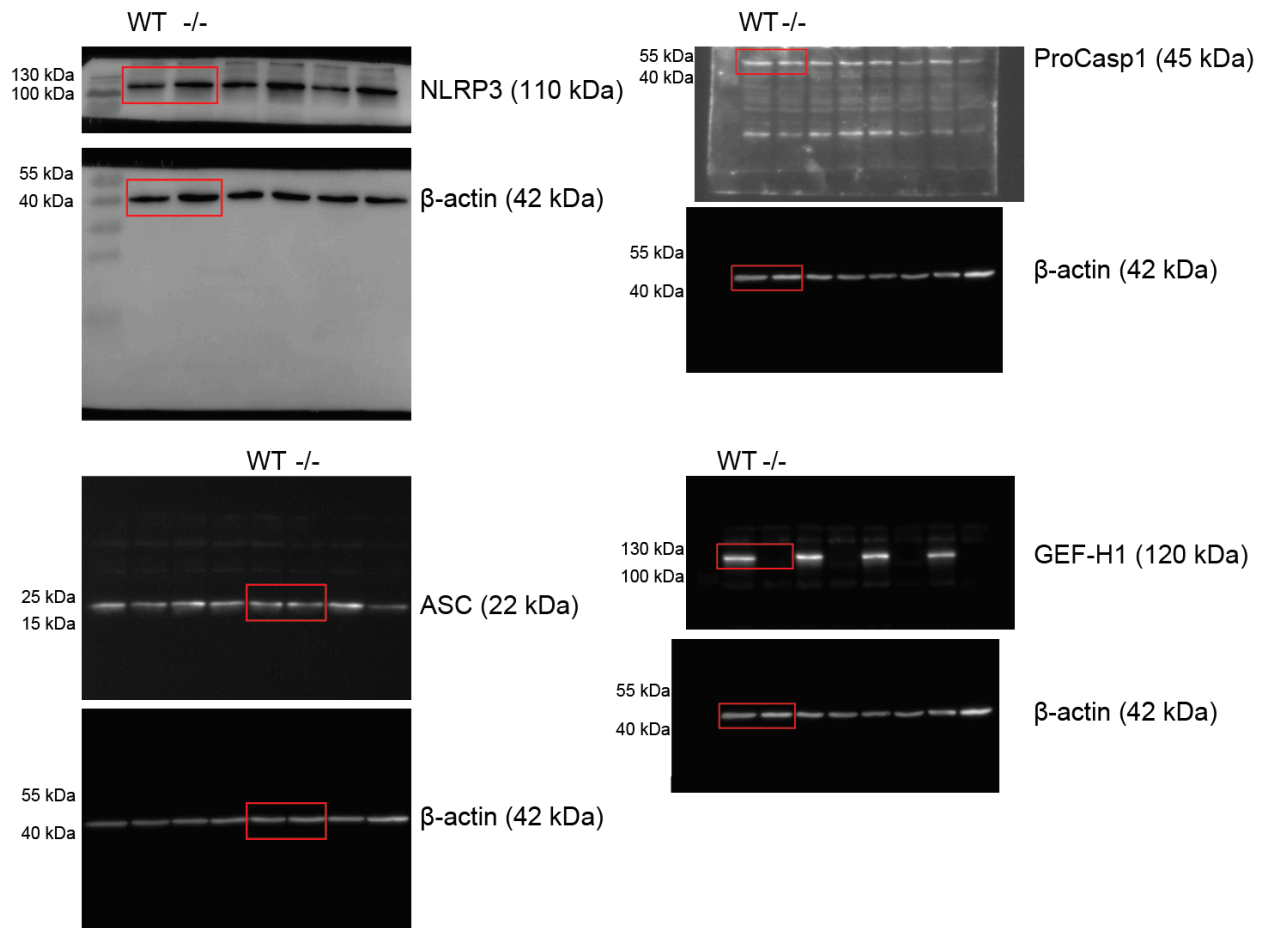

**Supplementary Figure 2. Uncropped pictures of the western blots shown in the manuscript in Figure 2B.**

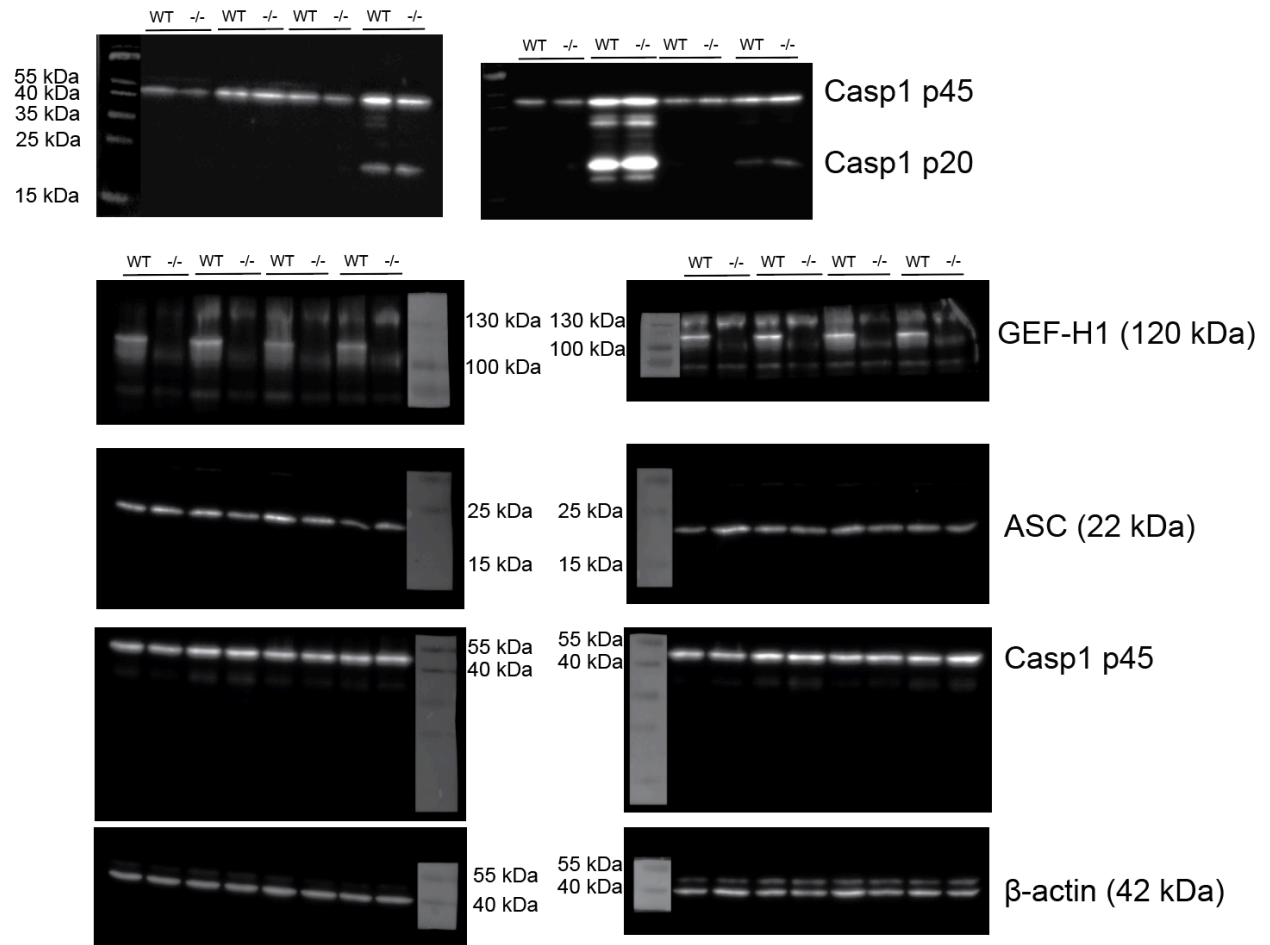

**Supplementary Figure 3. Uncropped pictures of the western blots shown in the manuscript in Figure 2D.**

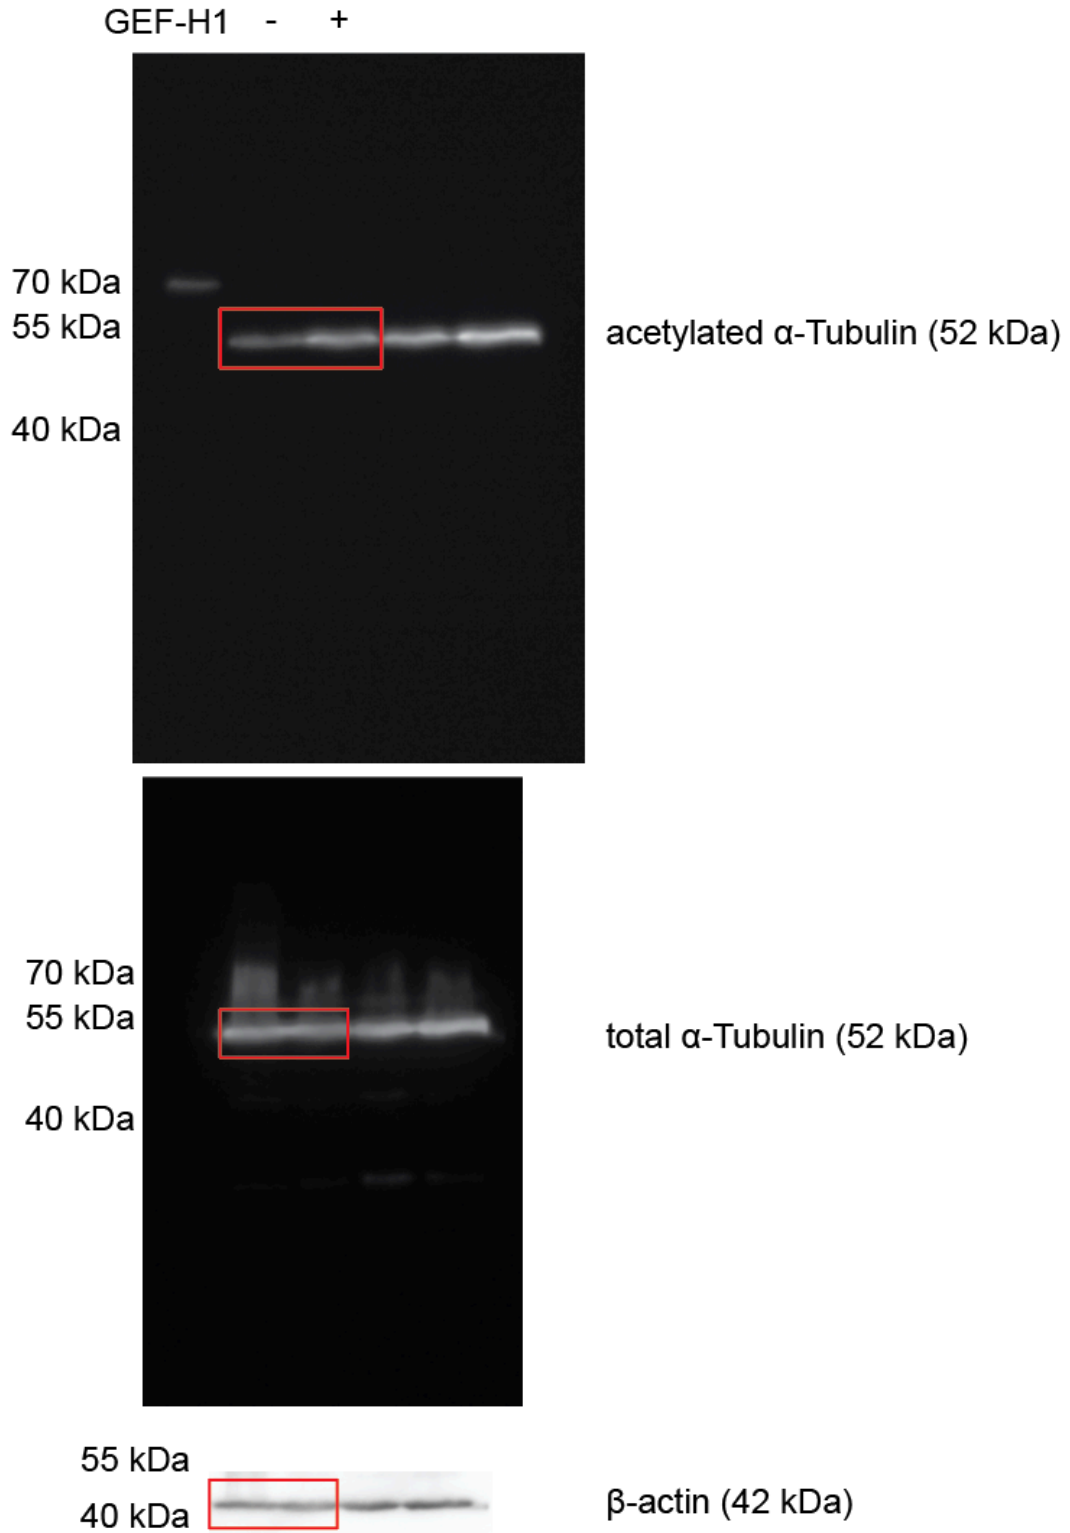

**Supplementary Figure 4. Uncropped pictures of the western blots shown in the manuscript in Figure 3A.**

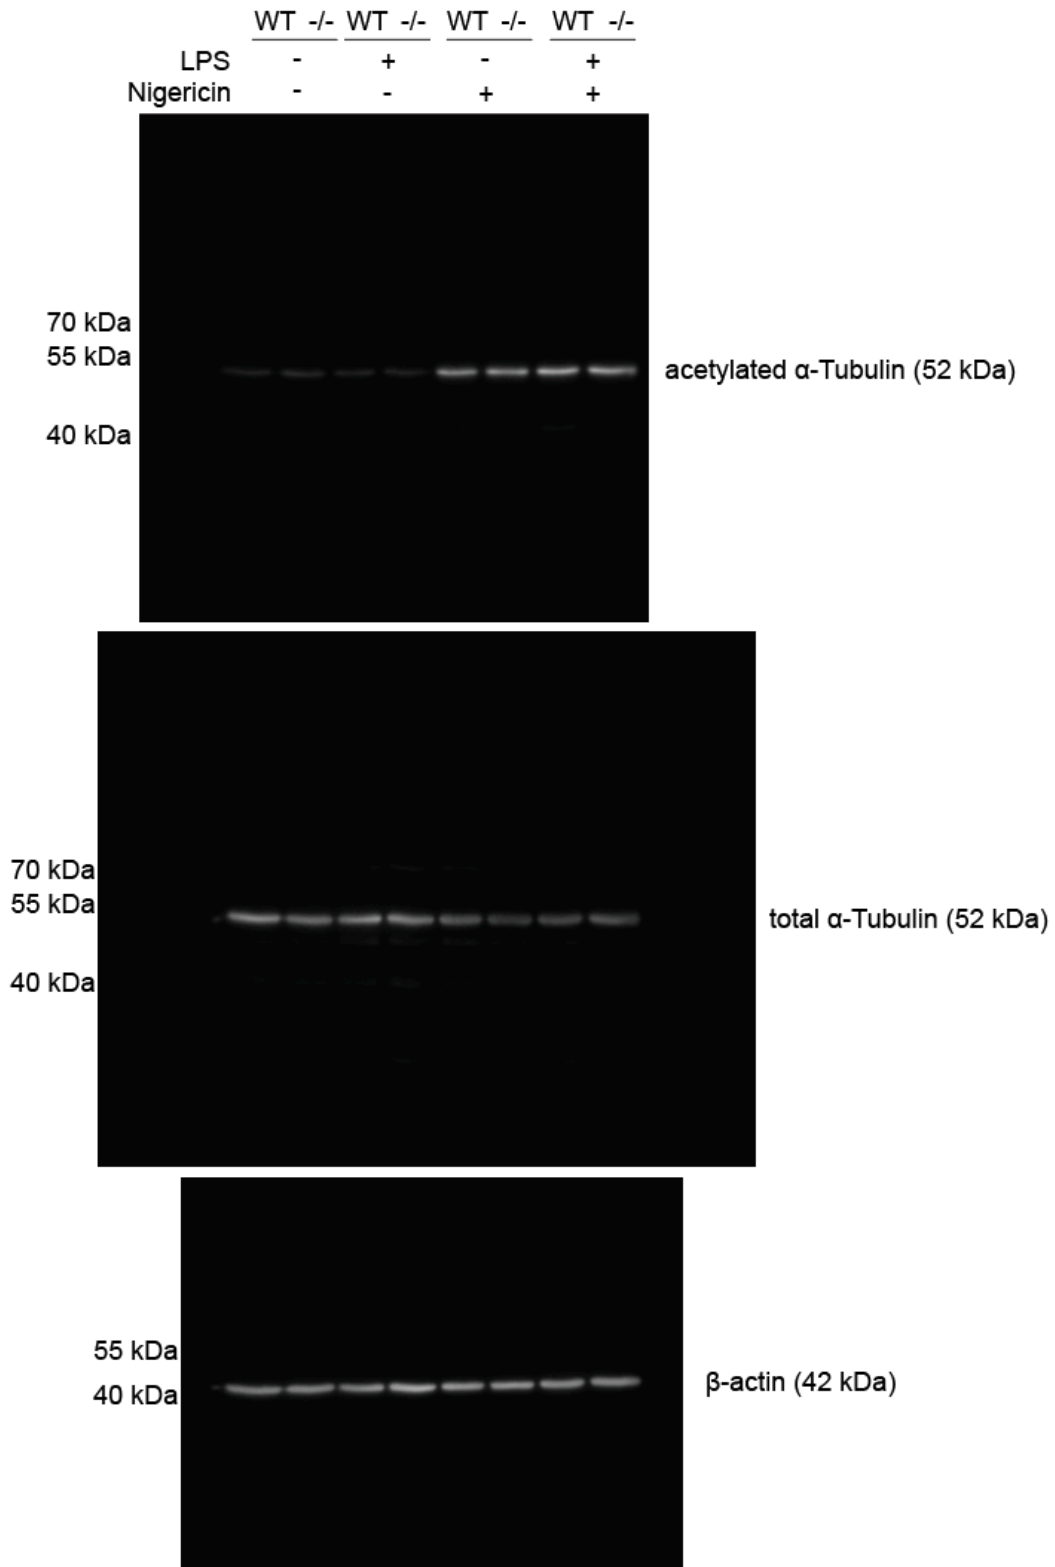

**Supplementary Figure 5. Uncropped pictures of the western blots shown in the manuscript in Figure 3B.**

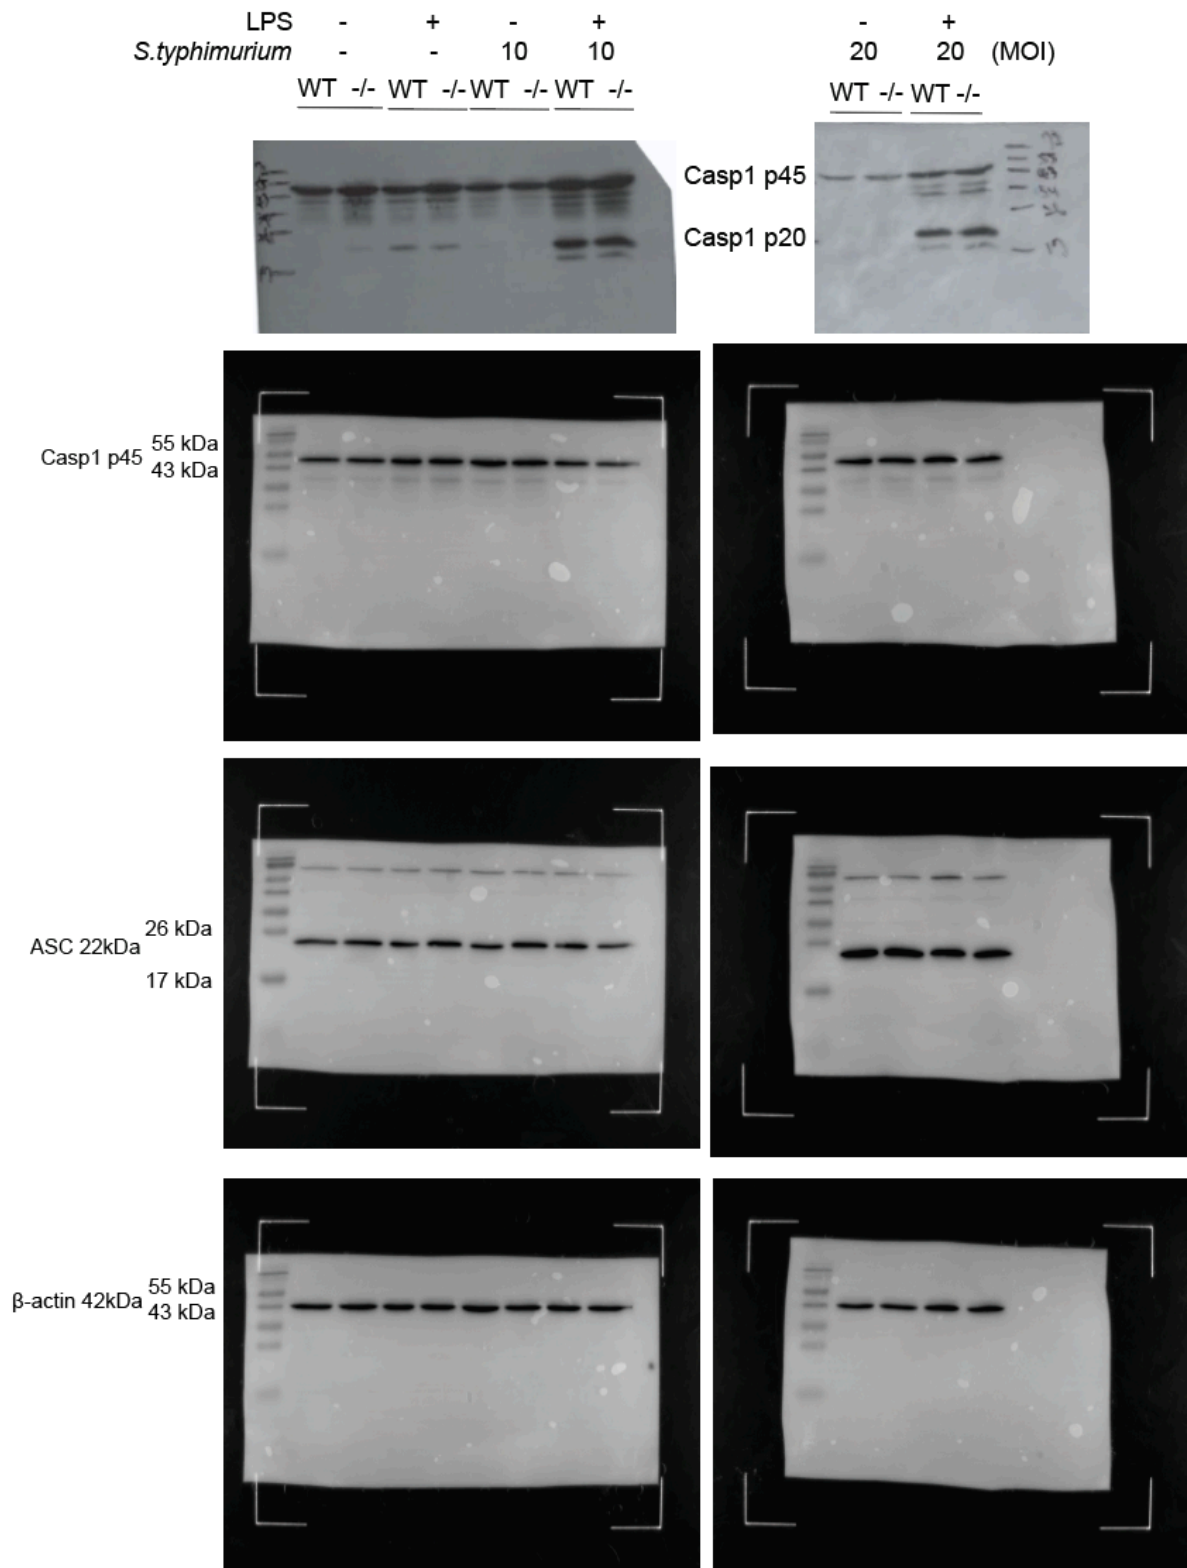

**Supplementary Figure 6. Uncropped pictures of the western blots shown in the manuscript in Figure 4B.**
